# Supplementary material for: Auxin-Mediated Transcriptional System with a Minimal Set of Components Is Critical for Morphogenesis through the Life Cycle in Marchantia polymorpha
Source: PLoS Genet. 2015 May 28;11(5):e1005084. doi: 10.1371/journal.pgen.1005084 (PMC4447296; doi:10.1371/journal.pgen.1005084)
Supplement: S2 Table — (XLSX) [file pgen.1005084.s008.xlsx]

## Sheet: Sheet1
Table S2. List of sequences used for phylogenetic analysis.
Name	Accession	Database*	Organism
MpIAA		GenBank/EMBL/DDBJ	M. polymorpha
Pp008G051100	Phpat.008G051100	JGI, phytozome 10, Physcomitrella patens v3.0	P. patens
Pp024G023400	Phpat.024G023400	JGI, phytozome 10, Physcomitrella patens v3.0	P. patens
Sm116126	116126	JGI, phytozome 10, Selaginella moellendorffii v1.0	S. moellendorffii
Sm26861	26861	JGI, phytozome 10, Selaginella moellendorffii v1.0	S. moellendorffii
Sm36236	36236	JGI, phytozome 10, Selaginella moellendorffii v1.0	S. moellendorffii
Sm85935	85935	JGI, phytozome 10, Selaginella moellendorffii v1.0	S. moellendorffii
IAA1	AT4G14560	TAIR	Arabidopsis
IAA2	AT3G23030	TAIR	Arabidopsis
IAA3	AT1G04240	TAIR	Arabidopsis
IAA4	AT5G43700	TAIR	Arabidopsis
IAA5	AT1G15580	TAIR	Arabidopsis
IAA6	AT1G52830	TAIR	Arabidopsis
IAA7	AT3G23050	TAIR	Arabidopsis
IAA8	AT2G22670	TAIR	Arabidopsis
IAA9	AT5G65670	TAIR	Arabidopsis
IAA10	AT1G04100	TAIR	Arabidopsis
IAA11	AT4G28640	TAIR	Arabidopsis
IAA12	AT1G04550	TAIR	Arabidopsis
IAA13	AT2G33310	TAIR	Arabidopsis
IAA14	AT4G14550	TAIR	Arabidopsis
IAA15	AT1G80390	TAIR	Arabidopsis
IAA16	AT3G04730	TAIR	Arabidopsis
IAA17	AT1G04250	TAIR	Arabidopsis
IAA18	AT1G51950	TAIR	Arabidopsis
IAA19	AT3G15540	TAIR	Arabidopsis
IAA20	AT2G46990	TAIR	Arabidopsis
IAA26	AT3G16500	TAIR	Arabidopsis
IAA27	AT4G29080	TAIR	Arabidopsis
IAA28	AT5G25890	TAIR	Arabidopsis
IAA29	AT4G32280	TAIR	Arabidopsis
IAA30	AT3G62100	TAIR	Arabidopsis
IAA31	AT3G17600	TAIR	Arabidopsis
IAA32	AT2G01200	TAIR	Arabidopsis
IAA33	AT5G57420	TAIR	Arabidopsis
IAA34	AT1G15050	TAIR	Arabidopsis
MpARF1		GenBank/EMBL/DDBJ	M. polymorpha
MpARF2		GenBank/EMBL/DDBJ	M. polymorpha
MpARF3		GenBank/EMBL/DDBJ	M. polymorpha
Pp001G055800	Phpat.001G055800	JGI, phytozome 10, Physcomitrella patens v3.0	P. patens
Pp001G055900	Phpat.001G055900	JGI, phytozome 10, Physcomitrella patens v3.0	P. patens
Pp001G160900	Phpat.001G160900	JGI, phytozome 10, Physcomitrella patens v3.0	P. patens
Pp002G106600	Phpat.002G106600	JGI, phytozome 10, Physcomitrella patens v3.0	P. patens
Pp004G047000	Phpat.004G047000	JGI, phytozome 10, Physcomitrella patens v3.0	P. patens
Pp004G047100	Phpat.004G047100	JGI, phytozome 10, Physcomitrella patens v3.0	P. patens
Pp005G035200	Phpat.005G035200	JGI, phytozome 10, Physcomitrella patens v3.0	P. patens
Pp006G079200	Phpat.006G079200	JGI, phytozome 10, Physcomitrella patens v3.0	P. patens
Pp006G097800	Phpat.006G097800	JGI, phytozome 10, Physcomitrella patens v3.0	P. patens
Pp013G016000	Phpat.013G016000	JGI, phytozome 10, Physcomitrella patens v3.0	P. patens
Pp014G064300	Phpat.014G064300	JGI, phytozome 10, Physcomitrella patens v3.0	P. patens
Pp016G023200	Phpat.016G023200	JGI, phytozome 10, Physcomitrella patens v3.0	P. patens
Pp017G075200	Phpat.017G075200	JGI, phytozome 10, Physcomitrella patens v3.0	P. patens
Pp026G040800	Phpat.026G040800	JGI, phytozome 10, Physcomitrella patens v3.0	P. patens
Pp027G000200	Phpat.027G000200	JGI, phytozome 10, Physcomitrella patens v3.0	P. patens
Sm117217	117217	JGI, phytozome 10, Selaginella moellendorffii v1.0	S. moellendorffii
Sm181406	181406	JGI, phytozome 10, Selaginella moellendorffii v1.0	S. moellendorffii
Sm424114	424114	JGI, phytozome 10, Selaginella moellendorffii v1.0	S. moellendorffii
Sm437944	437944	JGI, phytozome 10, Selaginella moellendorffii v1.0	S. moellendorffii
Sm51695	51695	JGI, phytozome 10, Selaginella moellendorffii v1.0	S. moellendorffii
Sm61688	61688	JGI, phytozome 10, Selaginella moellendorffii v1.0	S. moellendorffii
Sm81992	81992	JGI, phytozome 10, Selaginella moellendorffii v1.0	S. moellendorffii
ARF1	AT1G59750	TAIR	Arabidopsis
ARF2	AT5G62000	TAIR	Arabidopsis
ARF3	AT2G33860	TAIR	Arabidopsis
ARF4	AT5G60450	TAIR	Arabidopsis
ARF5	AT1G19850	TAIR	Arabidopsis
ARF6	AT1G30330	TAIR	Arabidopsis
ARF7	AT5G20730	TAIR	Arabidopsis
ARF8	AT5G37020	TAIR	Arabidopsis
ARF9	AT4G23980	TAIR	Arabidopsis
ARF10	AT2G28350	TAIR	Arabidopsis
ARF11	AT2G46530	TAIR	Arabidopsis
ARF12	AT1G34310	TAIR	Arabidopsis
ARF13	AT1G34170	TAIR	Arabidopsis
ARF14	AT1G35540	TAIR	Arabidopsis
ARF15	AT1G35520	TAIR	Arabidopsis
ARF16	AT4G30080	TAIR	Arabidopsis
ARF17	AT1G77850	TAIR	Arabidopsis
ARF18	AT3G61830	TAIR	Arabidopsis
ARF19	AT1G19220	TAIR	Arabidopsis
ARF20	AT1G35240	TAIR	Arabidopsis
ARF21	AT1G34410	TAIR	Arabidopsis
ARF22	AT1G34390	TAIR	Arabidopsis
MpCOI1		GenBank/EMBL/DDBJ	M. polymorpha
MpTIR1		GenBank/EMBL/DDBJ	M. polymorpha
Pp003G031500	Phpat.003G031500	JGI, phytozome 10, Physcomitrella patens v3.0	P. patens
Pp009G006900	Phpat.009G006900	JGI, phytozome 10, Physcomitrella patens v3.0	P. patens
Pp009G040700	Phpat.009G040700	JGI, phytozome 10, Physcomitrella patens v3.0	P. patens
Pp015G005100	Phpat.015G005100	JGI, phytozome 10, Physcomitrella patens v3.0	P. patens
Pp017G026000	Phpat.017G026000	JGI, phytozome 10, Physcomitrella patens v3.0	P. patens
Pp018G056700	Phpat.018G056700	JGI, phytozome 10, Physcomitrella patens v3.0	P. patens
Pp020G017800	Phpat.020G017800	JGI, phytozome 10, Physcomitrella patens v3.0	P. patens
Pp020G063300	Phpat.020G063300	JGI, phytozome 10, Physcomitrella patens v3.0	P. patens
Pp022G022600	Phpat.022G022600	JGI, phytozome 10, Physcomitrella patens v3.0	P. patens
Pp023G015200	Phpat.023G015200	JGI, phytozome 10, Physcomitrella patens v3.0	P. patens
Pp023G037400	Phpat.023G037400	JGI, phytozome 10, Physcomitrella patens v3.0	P. patens
Pp023G068100	Phpat.023G068100	JGI, phytozome 10, Physcomitrella patens v3.0	P. patens
Pp024G034400	Phpat.024G034400	JGI, phytozome 10, Physcomitrella patens v3.0	P. patens
Sm104859	104859	JGI, phytozome 10, Selaginella moellendorffii v1.0	S. moellendorffii
Sm11318	11318	JGI, phytozome 10, Selaginella moellendorffii v1.0	S. moellendorffii
Sm163526	163526	JGI, phytozome 10, Selaginella moellendorffii v1.0	S. moellendorffii
Sm168175	168175	JGI, phytozome 10, Selaginella moellendorffii v1.0	S. moellendorffii
Sm170974	170974	JGI, phytozome 10, Selaginella moellendorffii v1.0	S. moellendorffii
Sm75487	75487	JGI, phytozome 10, Selaginella moellendorffii v1.0	S. moellendorffii
Sm84100	84100	JGI, phytozome 10, Selaginella moellendorffii v1.0	S. moellendorffii
AFB1	AT4G03190	TAIR	Arabidopsis
AFB2	AT3G26810	TAIR	Arabidopsis
AFB3	AT1G12820	TAIR	Arabidopsis
AFB4	AT4G24390	TAIR	Arabidopsis
AFB5	AT5G49980	TAIR	Arabidopsis
COI1	AT2G39940	TAIR	Arabidopsis
TIR1	AT3G62980	TAIR	Arabidopsis
* JGI: http://phytozome.jgi.doe.gov/pz/portal.html, TAIR: http://www.arabidopsis.org
