# Supplementary material for: Auxin-Mediated Transcriptional System with a Minimal Set of Components Is Critical for Morphogenesis through the Life Cycle in Marchantia polymorpha
Source: PLoS Genet. 2015 May 28;11(5):e1005084. doi: 10.1371/journal.pgen.1005084 (PMC4447296; doi:10.1371/journal.pgen.1005084)
Supplement: S3 Table — (XLSX) [file pgen.1005084.s009.xlsx]

## Sheet: Sheet1
Table S3. List of primers used in the present study.
Name	Sequence	Purpose
degenerate-IAA_L2	GAGGCCCTTATGAAATGGCACGCNGARCAR	degenerate PCR
degenerate-IAA_R1	TCCGACGAGCATGAGATCTCCATCYTGRTCYTCRTA	degenerate PCR
MpIAA_entry	CACCTTGGGCACAATGAGTCAAAA	cloning
MpIAA_stop	CTCACACGTTCGGTTGAGTC	cloning
mDII-L3	GCCGTAGGTTGGTCTTCCATTCGATCG	mutagenesis
mDII-R3	CGATCGAATGGAAGACCAACCTACGGC	mutagenesis
MpIAA_usEntry	CACCACGGTTTCTTCGGATCACAC	cloning
MpIAA_R9	GCCATTGTTCACAAGACTCC	cloning
MpIAA_nonstop	CACGTTCGGTTGAGTCGTC	cloning, BiFC
attB2_R	GAGCTCTAAGCGCTGTTATCAA	semi-quantitative RT-PCR
MpIAA_dN2	CACCAAGATGTCCGCCCCTG	semi-quantitative RT-PCR
EcoRI-MpIAA_DII	TTTGAATTCGAAACCAAGCAGCAATCGTC	Y2H
MpIAA-BamHI	TTTGGATCCCTCACACGTTCGGTTGAGTC	Y2H
BamHI-MpIAA_DII_2	TTTGGATCCCGAAACCAAGCAGCAATC	Y2H
MpIAA-NotI	TTTGCGGCCGCCTCACACGTTCGGTTGAGTC	Y2H
EcoRI-MpARF1_CTD	TTTGAATTCTTCATGGCACCCGTATCTTC	Y2H
MpARF1-BamHI	TTTGGATCCGCCCTCGGGGAGTAATCA	Y2H
BamHI-MpARF1_CTD_2	TTTGGATCCCATGGCACCCGTATCTTCTC	Y2H
MpARF1-NotI	TTTGCGGCCGCGCCCTCGGGGAGTAATCA	Y2H
EcoRI-MpARF2_CTD	TTTGAATTCCAACAAGGTCCAGTTCGTAGC	Y2H
MpARF2-BamHI	TTTGGATCCGCGCCTCCTACATGTCGTC	Y2H
BamHI-MpARF2_CTD	TTTGGATCCTCAACAAGGTCCAGTTCGTAGC	Y2H
MpARF2-NotI	TTTGCGGCCGCGCGCCTCCTACATGTCGTC	Y2H
EcoRI-MpARF3_CTD	TTTGAATTCGGTGAGTCCTTCTCGCACTG	Y2H
MpARF3-BamHI	TTTGGATCCTGGTGCCTAGCCTGCTACTG	Y2H
BamHI-MpARF3_CTD	TTTGGATCCTGGTGAGTCCTTCTCGCACTG	Y2H
MpARF3-NotI	TTTGCGGCCGCTGGTGCCTAGCCTGCTACTG	Y2H
MpIAA_dN3	CACCATGGAAACCAAGCAGCAATCGTC	BiFC
MpARF1_CTDentry	CACCATGTTCATGGCACCCGTATCTTC	BiFC
MpARF1_nonstop	GGGGCACCCCCGCTGGGCATCATT	BiFC
MpARF2_CTDentry	CACCATGCAACAAGGTCCAGTTCGTAGC	BiFC
MpARF2_nonstop	CATGTCGTCGCCGCGC	BiFC
MpARF3_CTDentry	CACCATGGGTGAGTCCTTCTCGCACTG	BiFC
MpARF3_nonstop	CTGCGACCGCGTTTTG	BiFC
MpARF1_F_inf3	CAGTTGACTGTATCGATGTATTCTTGTTCGCCGATG	Transactivation
MpARF1_R_inf3	TCGAGCTCTAAATCGTCAGGGGCACCCCC	Transactivation
MpARF1_MR_F_inf	CAGTTGACTGTATCGGTTGGCTGGGATGAATCTAC	Transactivation
MpARF1_MR_R_inf	TCGAGCTCTAAATCGCAAGGTGAACACGCAAATCT	Transactivation
MpARF2_F_inf	CAGTTGACTGTATCGATGTCAGAAGCATCTTCCATCAC	Transactivation
MpARF2_R_inf2	TCGAGCTCTAAATCGCGCCTCCTACATGTCGTC	Transactivation
MpARF2_MR_F_inf	CAGTTGAGTGTATCGTCACCATGGGAAGTGGAG	Transactivation
MpARF2_MR_R_inf	TCGAGCTCTAAATCGCCTGCTTGTGAATCTTCGTG	Transactivation
MpARF3_F_inf	CAGTTGACTGTATCGTCCTTTCTGTTTGGGATGC	Transactivation
MpARF3_Rlong_inf	TCGAGCTCTAAATCGCTGTCAAGCATACTGTCAATGG	Transactivation
MpARF3_MR_F_inf	CAGTTGACTGTATCGCCGGATTTGTTACAGGGAGT	Transactivation
MpARF3_MR_R_inf2	TCGAGCTCTAAATCGATGCGGCGAGCTTCTCTC	Transactivation
